# Supplementary material for: Lipid hydroxide determination on a ferrocenemethanol modified electrode
Source: Royal Society of Chemistry journal article supplement (doi:10.1039/c3ay26494g), 2013-01-01
Supplement: c3ay26494g.pdf [file c3ay26494g.pdf]

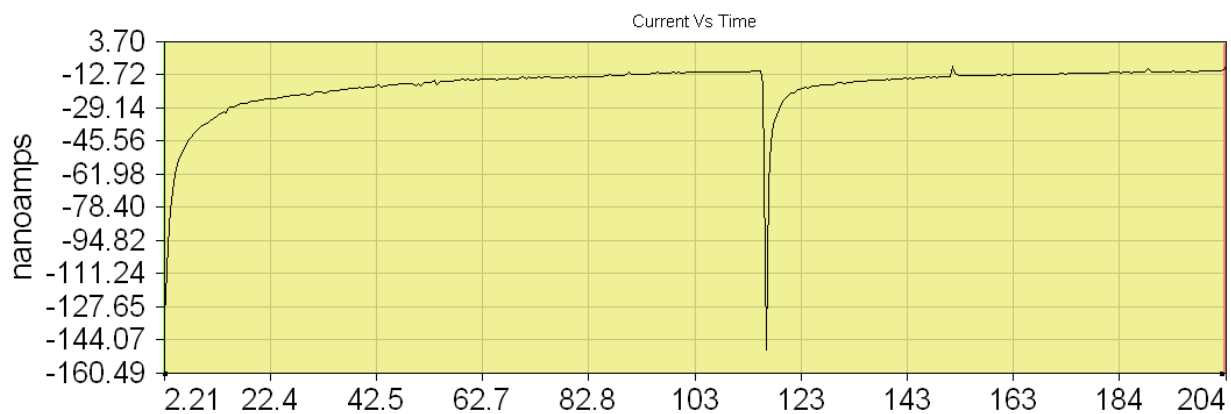

Fig. 1. Amperometric response of  $10^{-5}$  mol/L linoleic acid. The supporting electrolyte: 0.1 mol/L KCl containing 0.1 mL/100 mL Tween. The applied potential -100 mV vs. Ag/AgCl.

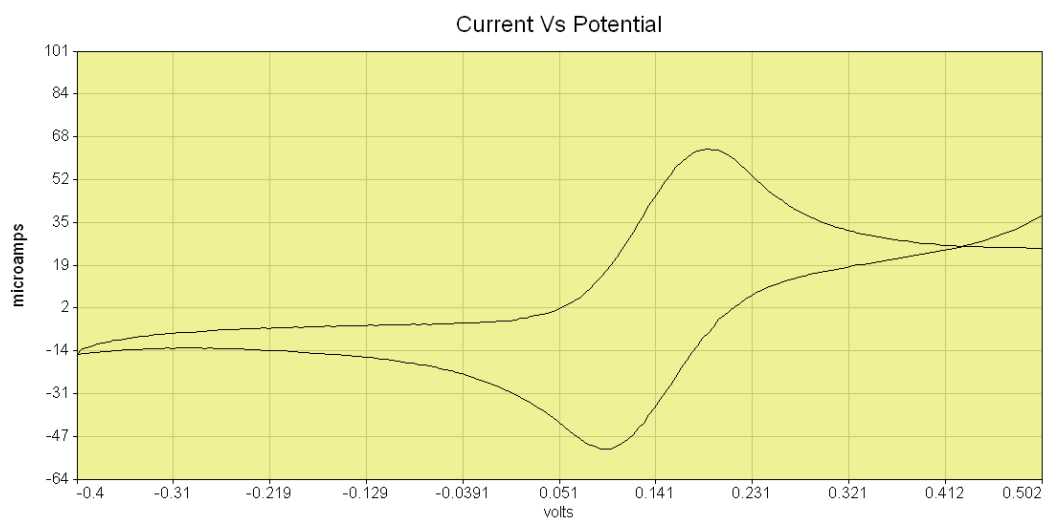

Fig. 2. Cyclic voltammogram of  $10^{-3}$  mol/L linoleic acid. The supporting electrolyte: 0.1 mol/L KCl containing 0.1 mL/100 mL Tween.
